# Supplementary material
Source: PubMed Central journal article supplement (PMC9111753)

**Supplementary Figure 1:**

Inhibition curve (neutralization activity) of patient serum samples against SARS-CoV-2 Spikedelta21-D614G pseudotyped lentiviral particles with Luciferase-IReS-ZsGreen backbone (gifts from Dr. Jesse Bloom). The Fraction infectivity of each dilution point is calculated by % reduction of RLU (relative light units) compare to the negative controls. SPSS program was used to calculate the IC50 (Half-maximal inhibitory concentration) and IC80 (80% inhibitory concentration). ND50 (50% neutralization dilution) and ND80 (80% neutralization dilution) were calculated as the reciprocal of IC50 and IC80.

Subject inhibition curves depicted by Visit number: Visit 1 (prevaccine), Visit 2 (1 month after 1st vaccine), Visit 3 (3 months after 1st vaccine), Visit 4 (6 months after 1st vaccine).

A001  
Visit 1

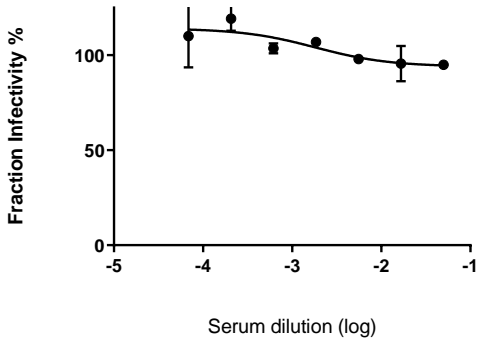

A001  
Visit 2

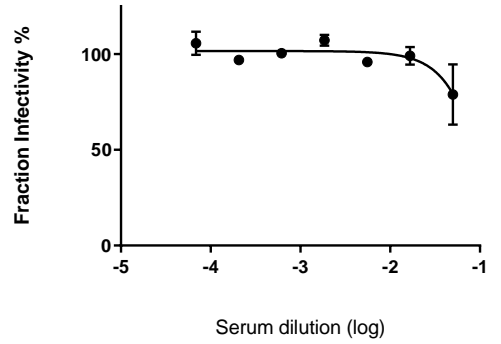

A001  
Visit 3

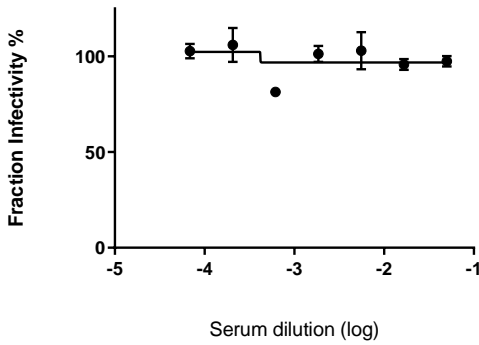

A002  
Visit 1

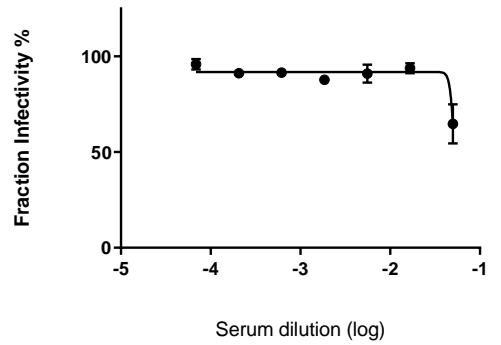

A002  
Visit 2

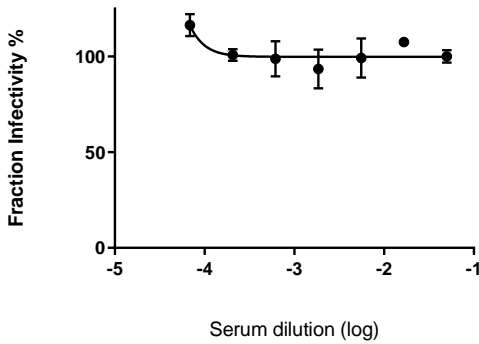

A002  
Visit 3

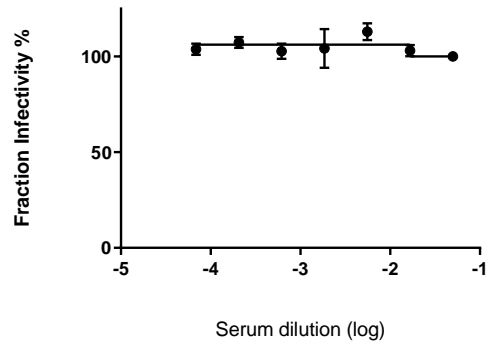

A004  
Visit 1

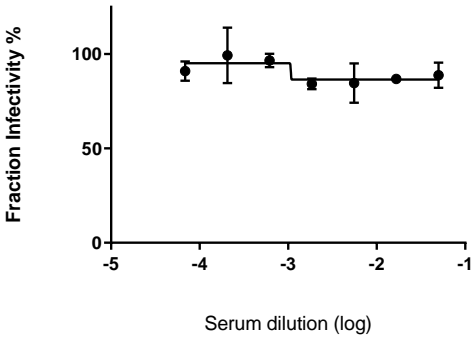

A004  
Visit 2

|           |        |
|-----------|--------|
| ND50      | 2520   |
| ND80      | 593.0  |
| R squared | 0.9966 |

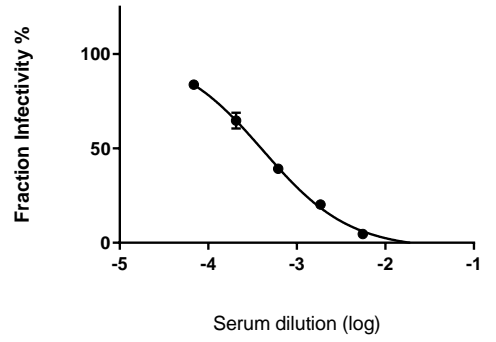

A004  
Visit 3

|           |        |
|-----------|--------|
| ND50      | 312.6  |
| ND80      | 96.89  |
| R squared | 0.9918 |

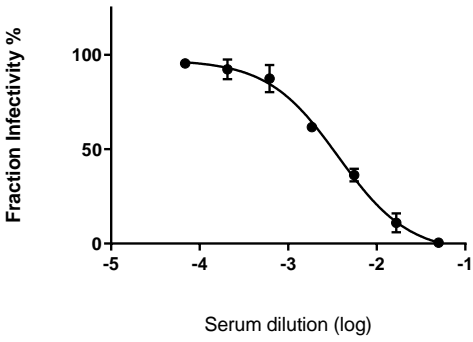

A004  
Visit 4

|           |        |
|-----------|--------|
| ND50      | 4381   |
| ND80      | 2194   |
| R squared | 0.9982 |

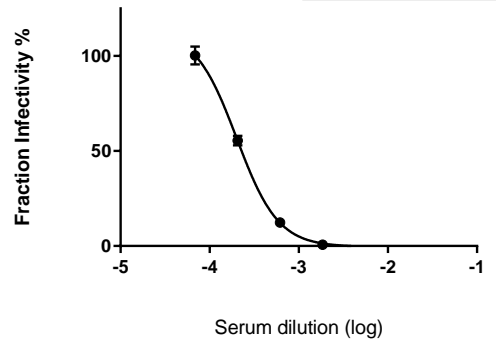

A005  
Visit 1

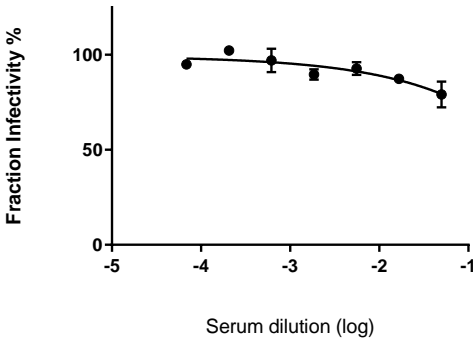

A005  
Visit 2

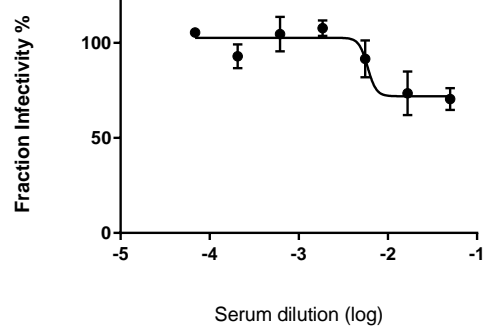

A005  
Visit 3

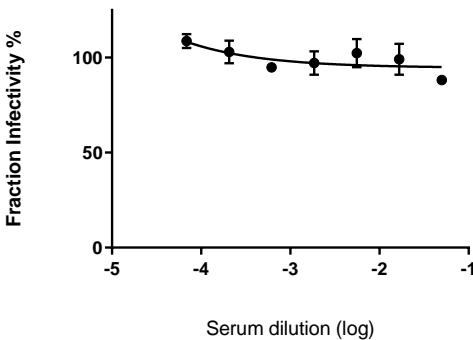

A006  
Visit 1

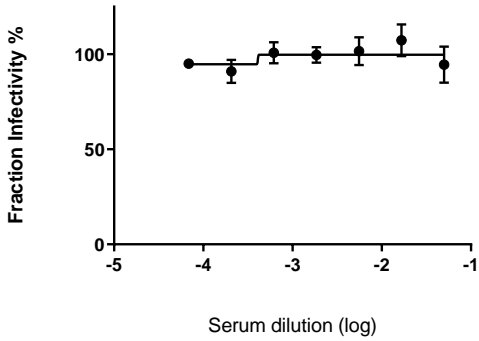

A006  
Visit 2

|           |        |
|-----------|--------|
| ND50      | 569.9  |
| ND80      | 161.2  |
| R squared | 0.9685 |

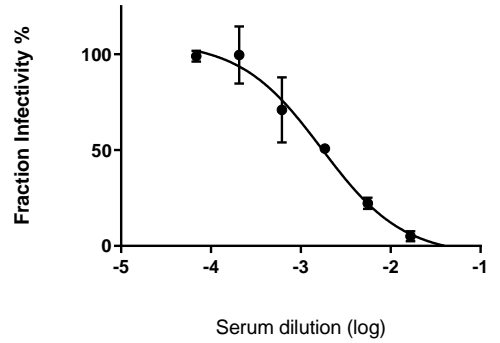

A006  
Visit 3

|           |        |
|-----------|--------|
| ND50      | 37.74  |
| ND80      | 15.04  |
| R squared | 0.9742 |

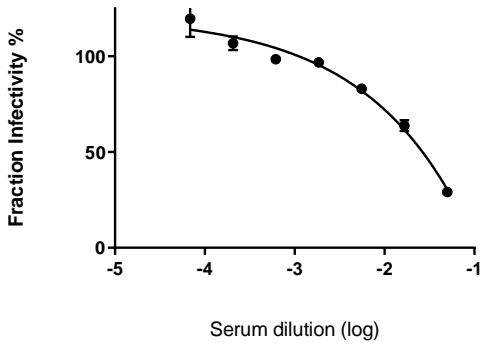

A006  
Visit 4

|           |        |
|-----------|--------|
| ND50      | 998.8  |
| ND80      | 437.6  |
| R squared | 0.9840 |

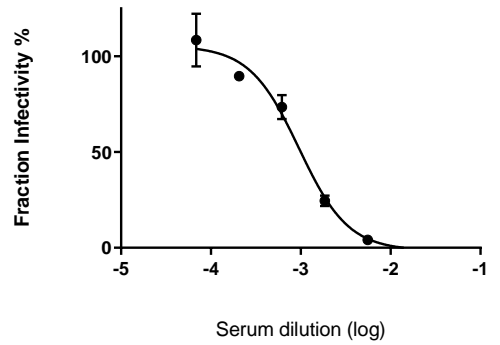

A008  
Visit 1

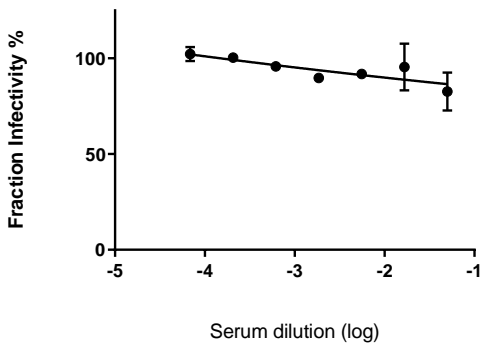

A008  
Visit 2

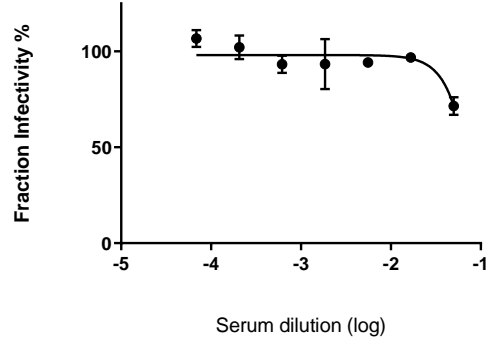

A009  
Visit 1

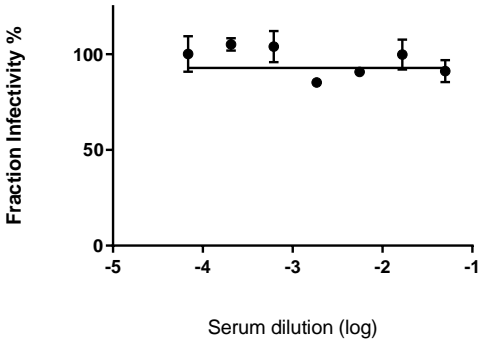

A009  
Visit 2

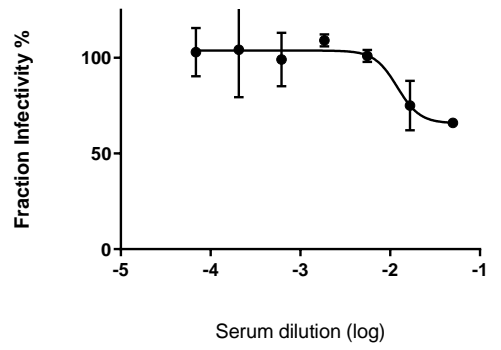

A009  
Visit 3

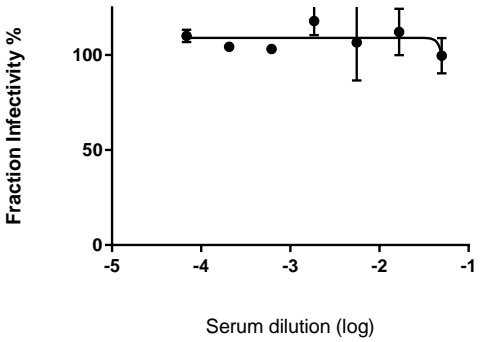

A011  
Visit 1

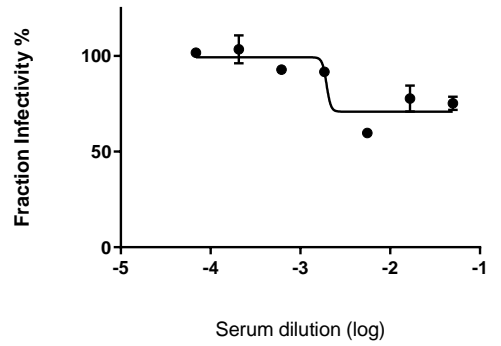

A011  
Visit 2

|           |        |
|-----------|--------|
| ND50      | 20.78  |
| ND80      | 0.000  |
| R squared | 0.9399 |

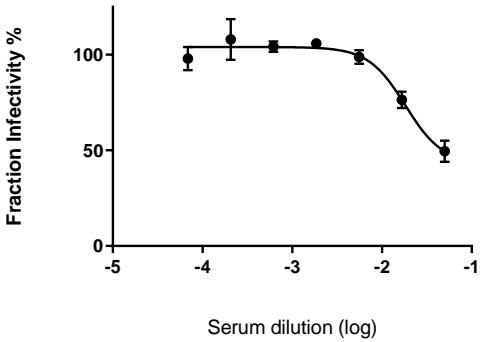

A011  
Visit 3

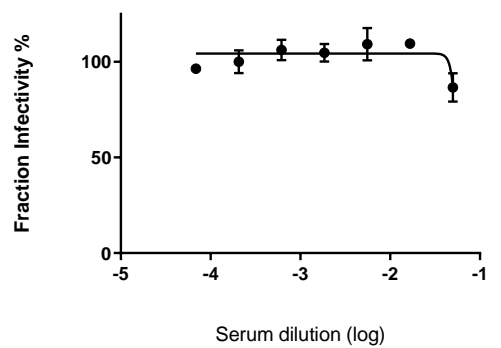

A011  
Visit 4

|           |        |
|-----------|--------|
| ND50      | 1133   |
| ND80      | 351.2  |
| R squared | 0.9917 |

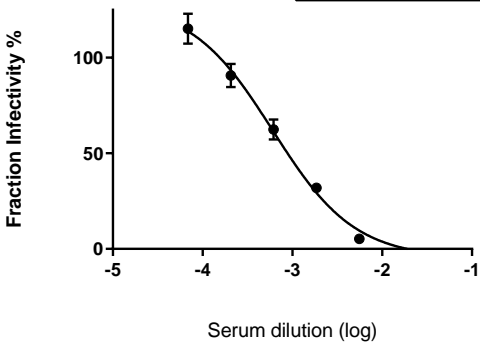

B001  
Visit 1

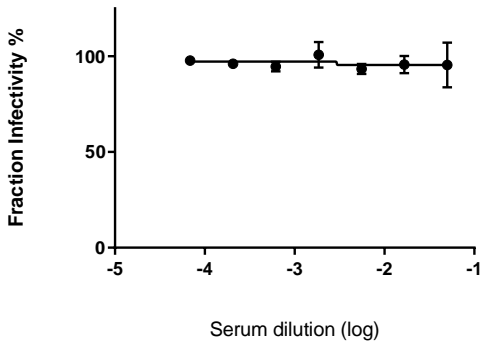

B001  
Visit 2

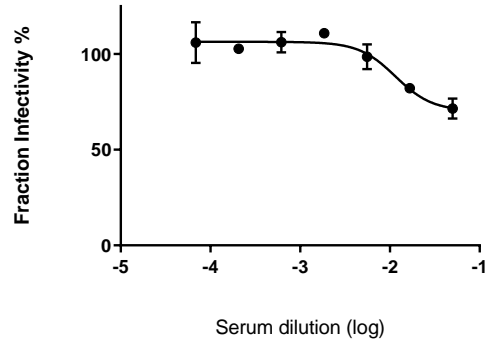

B001  
Visit 3

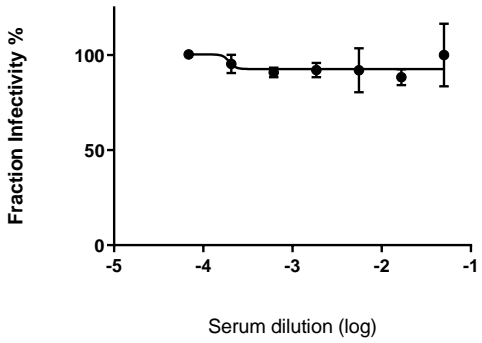

B002  
Visit 1

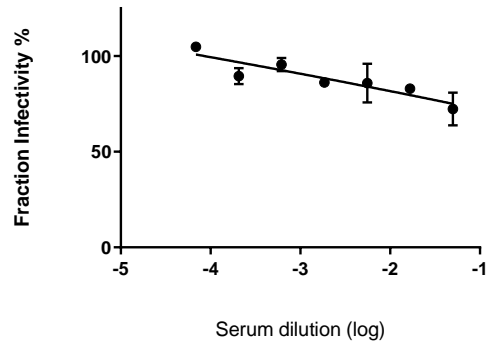

B002  
Visit 2

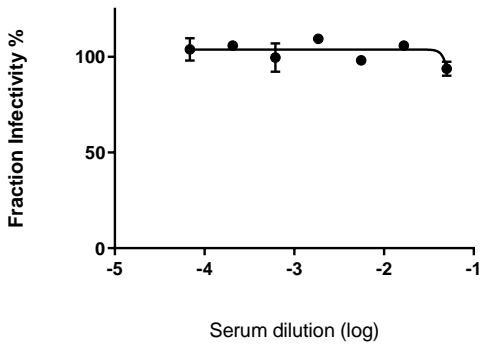

B005  
Visit 1

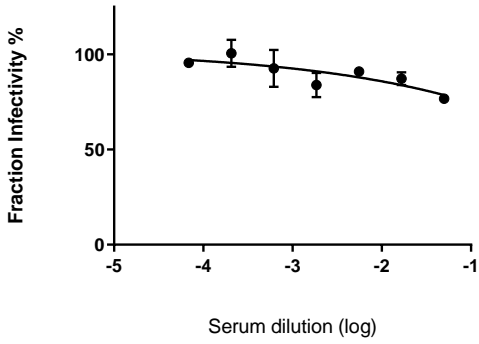

B005  
Visit 2

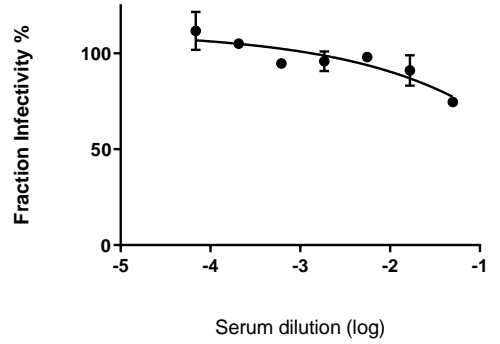

B005  
Visit 3

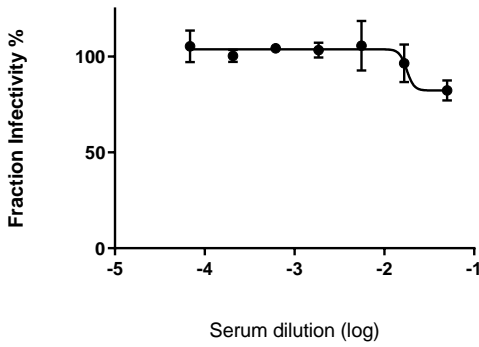

B006  
Visit 1

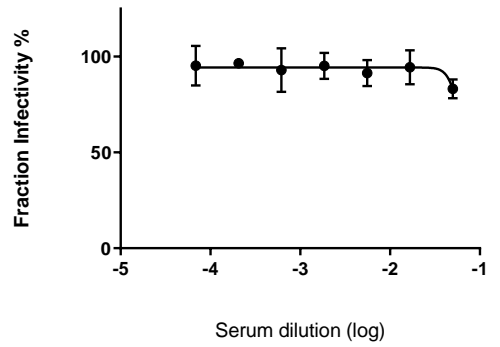

B006  
Visit 2

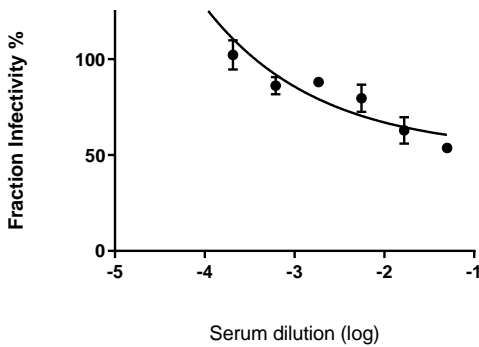

B006  
Visit 3

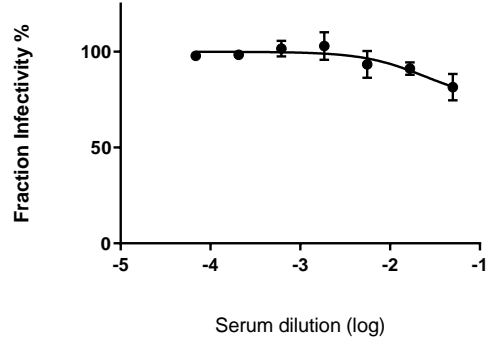

B007  
Visit 1

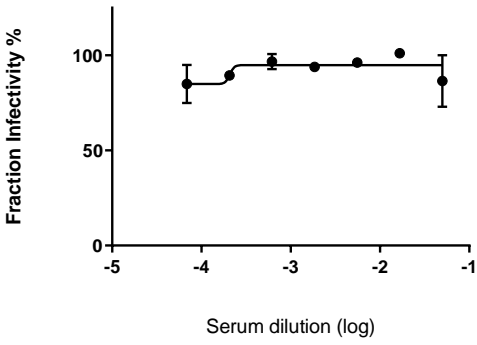

B007  
Visit 2

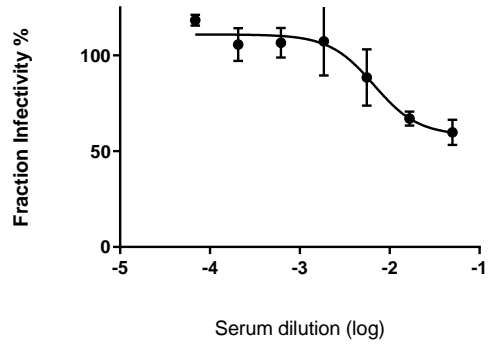

B007  
Visit 3

|           |        |
|-----------|--------|
| ND50      | 27.50  |
| ND80      | 10.40  |
| R squared | 0.9383 |

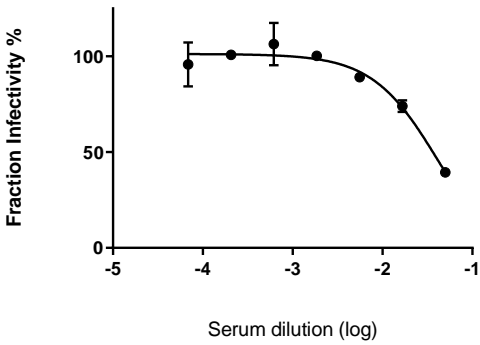

B007  
Visit 4

|           |        |
|-----------|--------|
| ND50      | 3124   |
| ND80      | 1303   |
| R squared | 0.9970 |

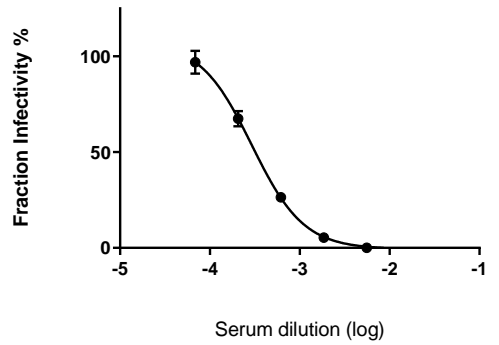

B008  
Visit 1

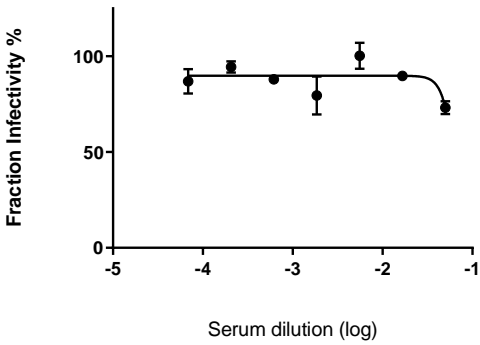

B008  
Visit 2

|           |        |
|-----------|--------|
| ND50      | 228.0  |
| ND80      | 60.52  |
| R squared | 0.9832 |

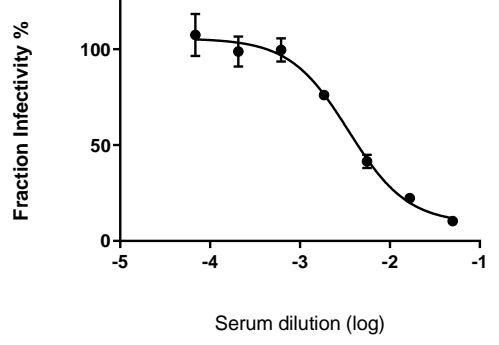

B008  
Visit 3

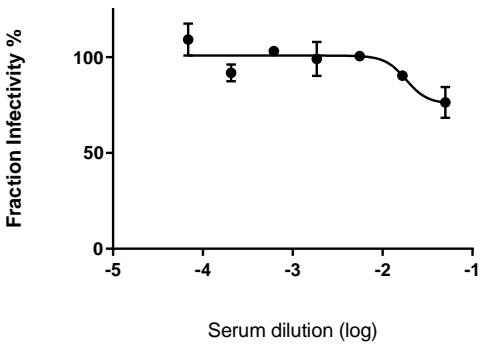



B009  
Visit 1

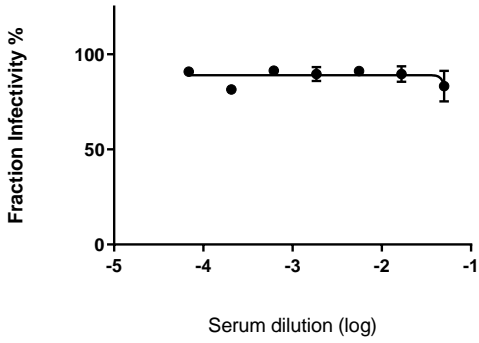

B009  
Visit 2

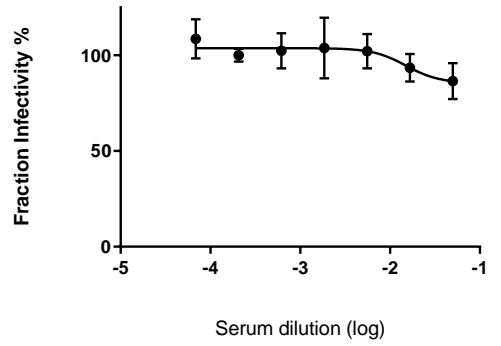

B010  
Visit 1

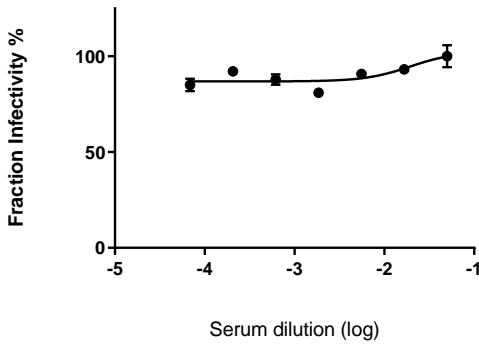

B010  
Visit 2

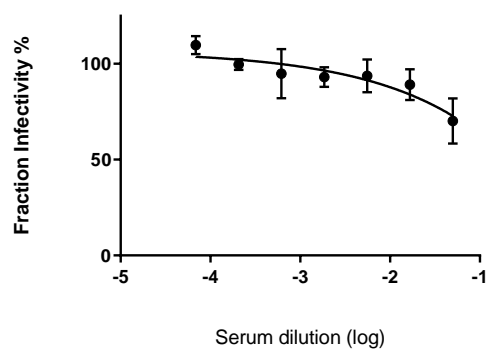

B010  
Visit 3

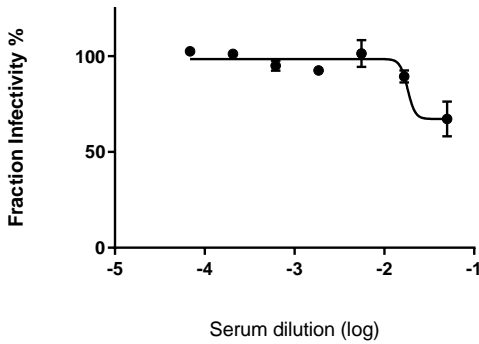

B010  
Visit 4

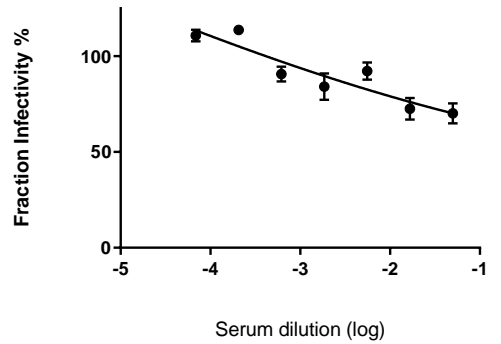

B011  
Visit 1

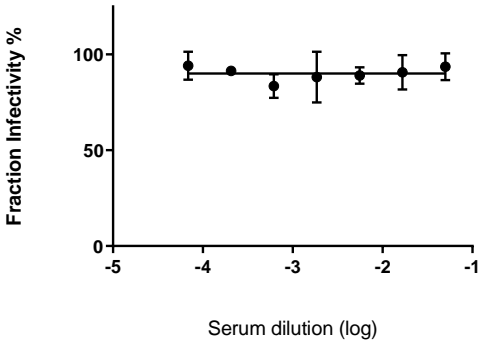

B011  
Visit 2

|           |        |
|-----------|--------|
| ND50      | 51.89  |
| ND80      | 18.70  |
| R squared | 0.9330 |

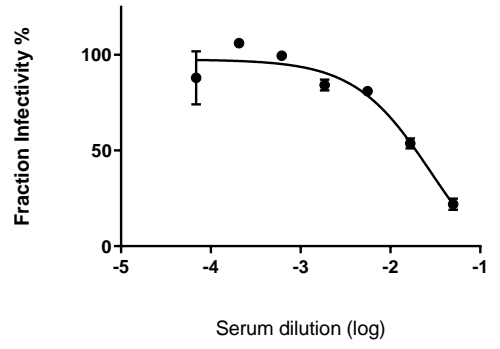

B011  
Visit 3

|           |        |
|-----------|--------|
| ND50      | 37.65  |
| ND80      | 16.09  |
| R squared | 0.9689 |

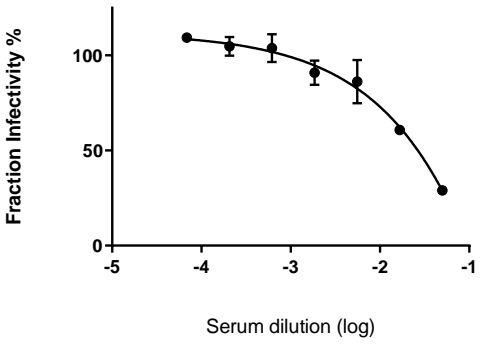

B011  
Visit 4

|           |        |
|-----------|--------|
| ND50      | 11257  |
| ND80      | 5031   |
| R squared | 0.9869 |

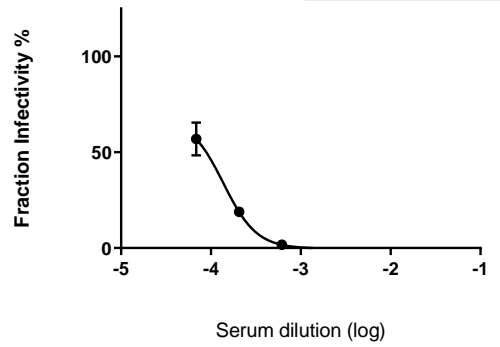

B012  
Visit 1

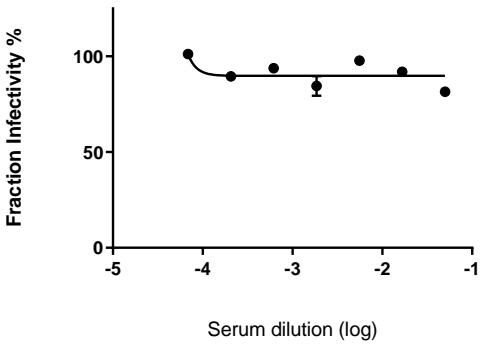

B012  
Visit 2

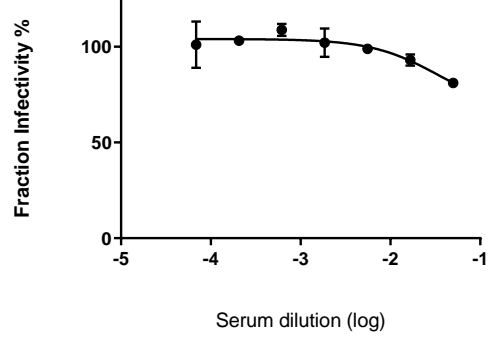

B012  
Visit 3

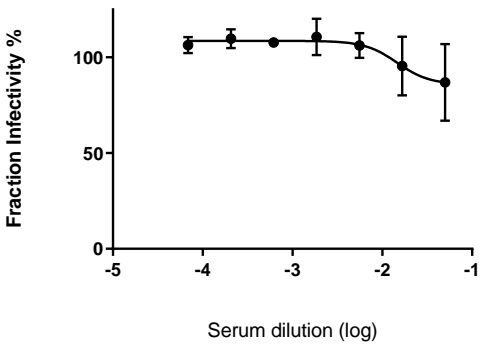

B014  
Visit 1

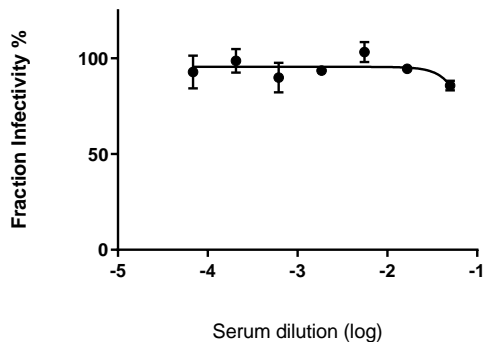

B014  
Visit 2

|           |        |
|-----------|--------|
| ND50      | 23.54  |
| ND80      | 0.000  |
| R squared | 0.9439 |

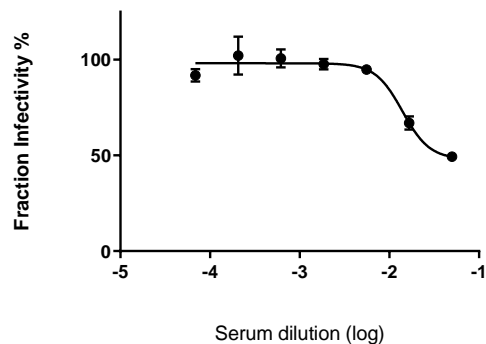

B014  
Visit 3

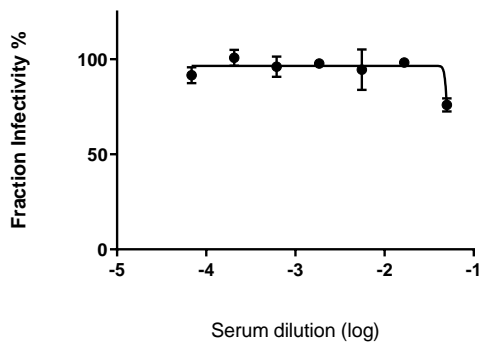

B014  
Visit 4

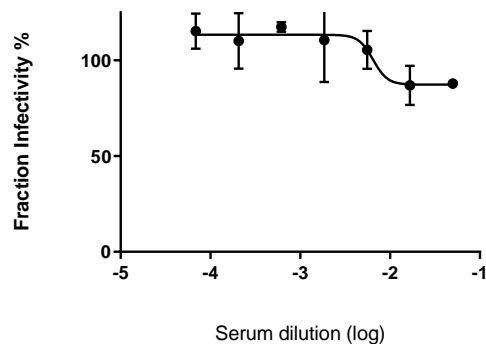

B016  
Visit 1

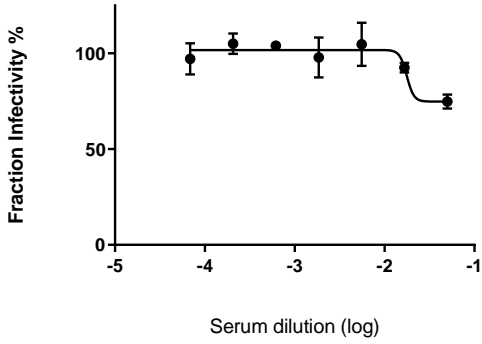

B016  
Visit 2

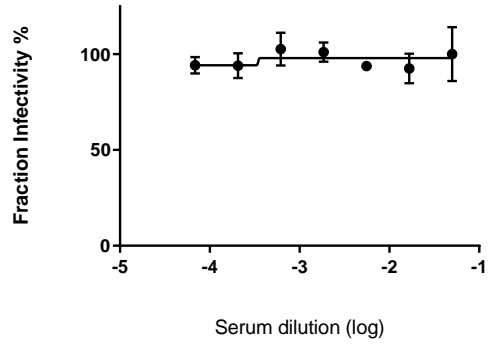

B016  
Visit 3

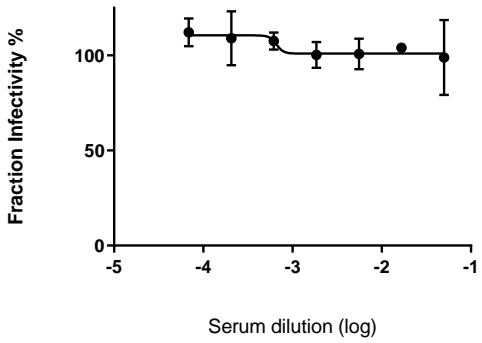

B017  
Visit 1

|           |        |
|-----------|--------|
| ND50      | 20.89  |
| ND80      | 7.010  |
| R squared | 0.9117 |

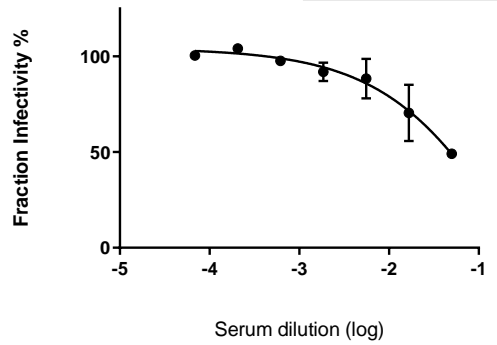

B017  
Visit 2

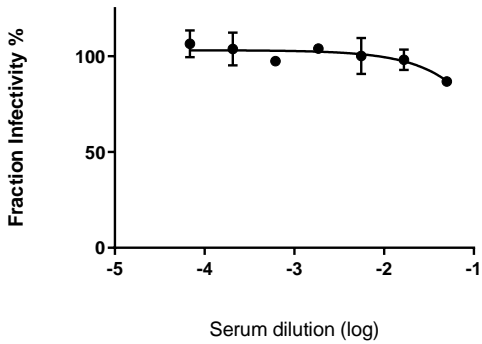

B017  
Visit 3

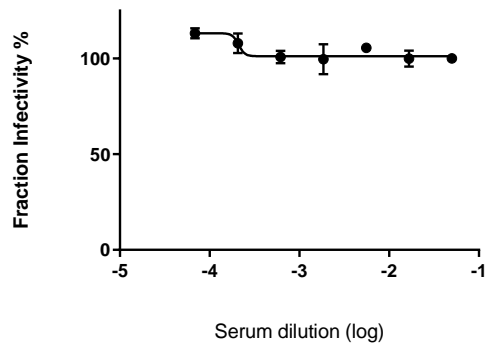

B018  
Visit 1

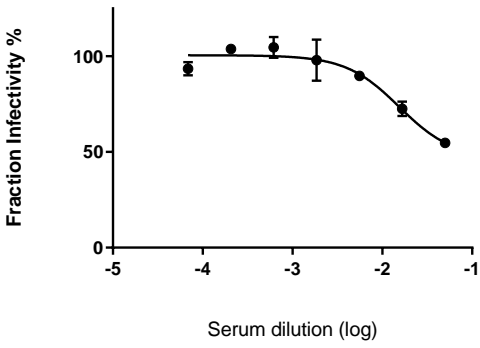

B018  
Visit 2

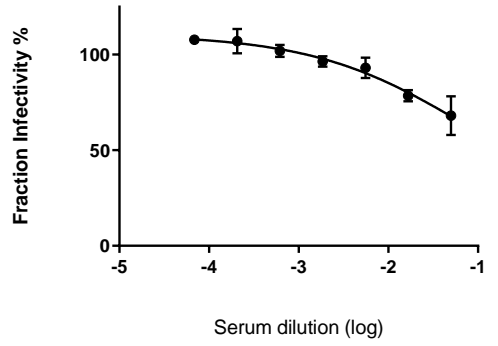

B018  
Visit 3

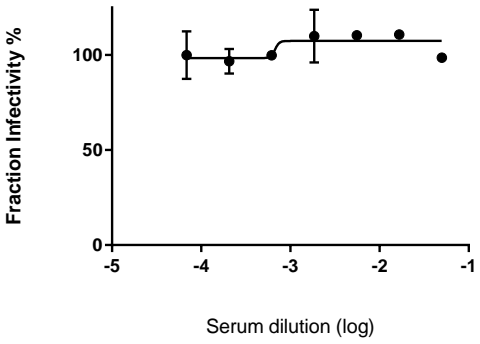

B019  
Visit 1

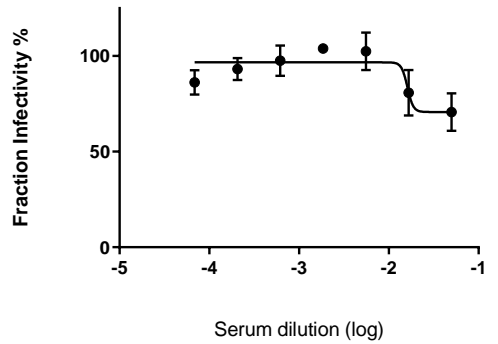

B019  
Visit 2

|           |        |
|-----------|--------|
| ND50      | 154.5  |
| ND80      | 30.10  |
| R squared | 0.9589 |

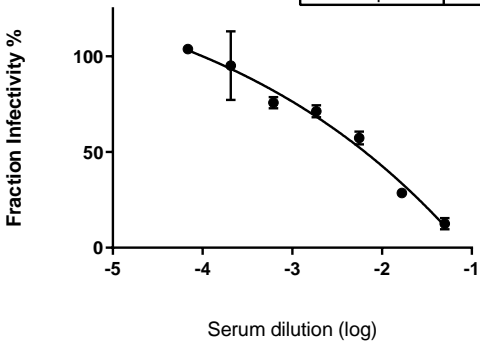

B019  
Visit 3

|           |        |
|-----------|--------|
| ND50      | 683.8  |
| ND80      | 122.2  |
| R squared | 0.9678 |

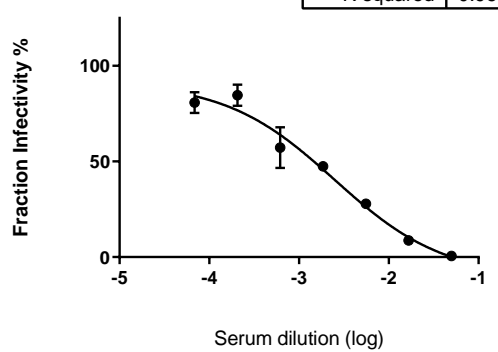

B019  
Visit 4

|           |        |
|-----------|--------|
| ND50      | 0.000  |
| ND80      | 14836  |
| R squared | 0.9964 |

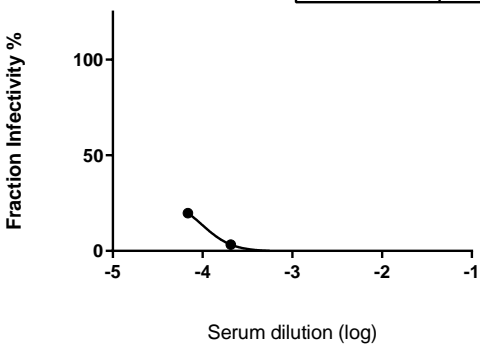

C001  
Visit 1

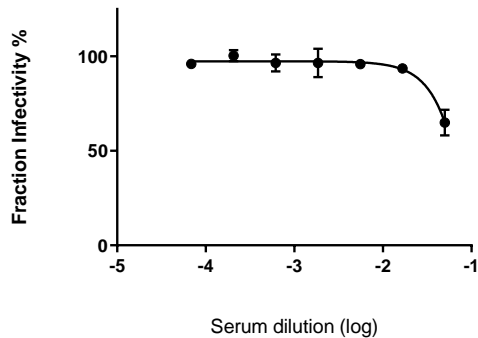

C001  
Visit 2

|           |        |
|-----------|--------|
| ND50      | 23.08  |
| ND80      | 0.000  |
| R squared | 0.9472 |

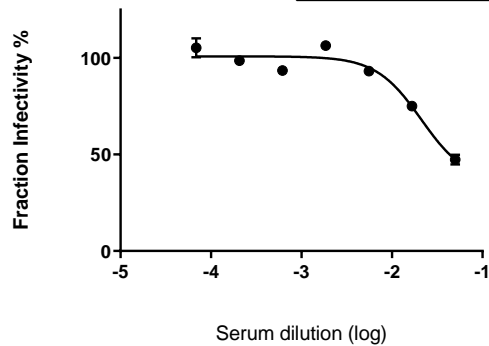

C001  
Visit 3

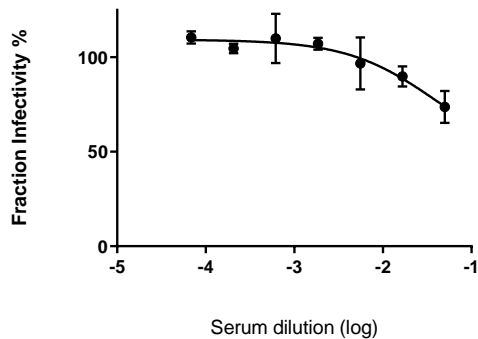

C001  
Visit 4

|           |        |
|-----------|--------|
| ND50      | 1815   |
| ND80      | 862.4  |
| R squared | 0.9969 |

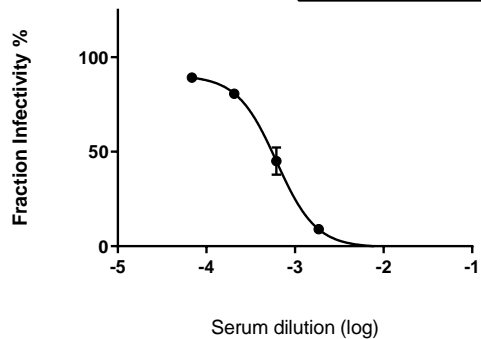

C002  
Visit 1

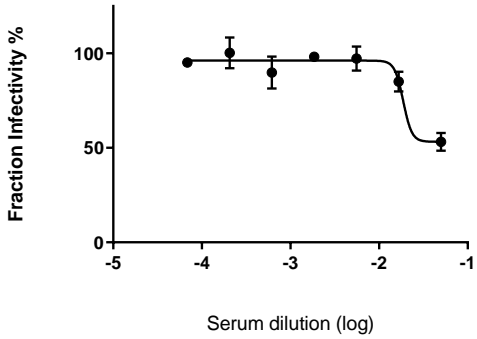

C002  
Visit 2

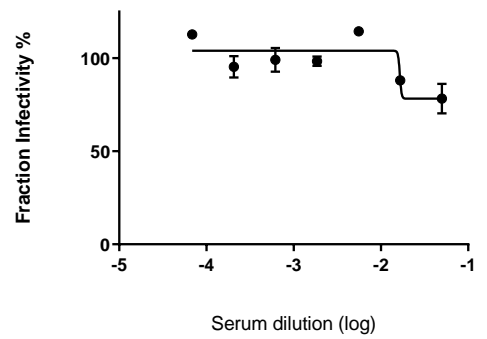

C002  
Visit 3

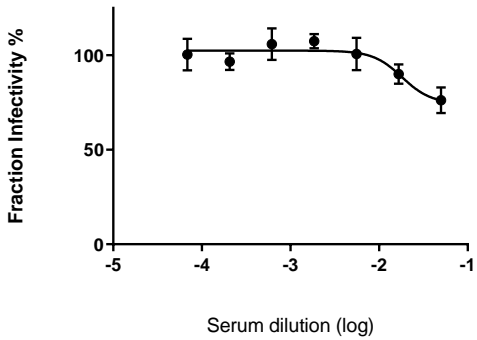

C002  
Visit 4

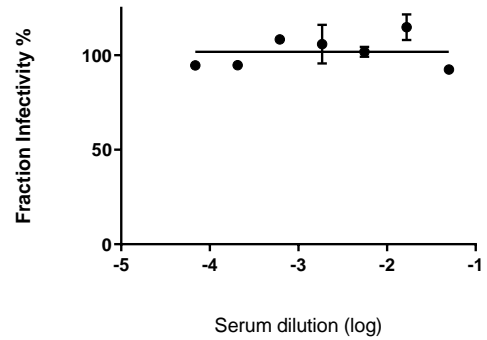

C003  
Visit 1

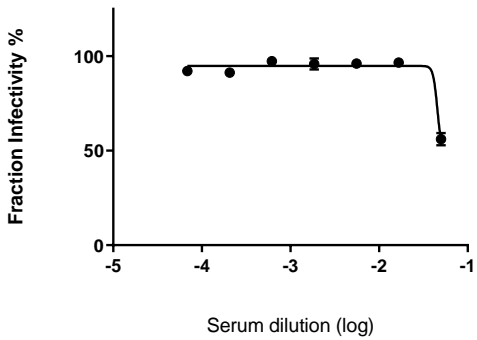

C003  
Visit 2

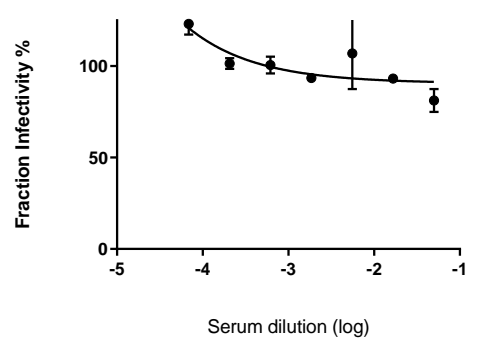

C004  
Visit 1

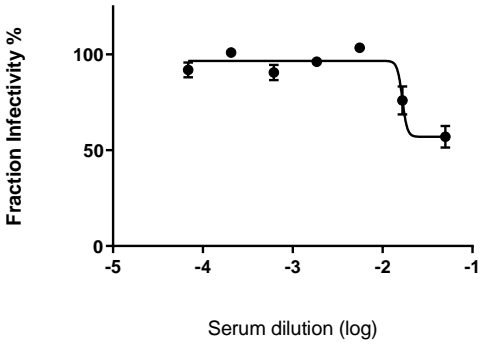

C004  
Visit 2

|           |        |
|-----------|--------|
| ND50      | 166.9  |
| ND80      | 59.93  |
| R squared | 0.9818 |

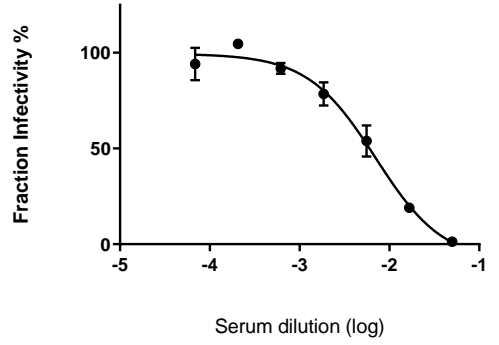

C004  
Visit 3

|           |        |
|-----------|--------|
| ND50      | 43.91  |
| ND80      | 0.000  |
| R squared | 0.9548 |

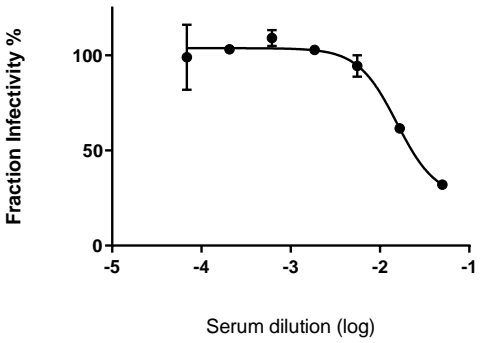

C004  
Visit 4

|           |        |
|-----------|--------|
| ND50      | 31.88  |
| ND80      | 13.15  |
| R squared | 0.9780 |

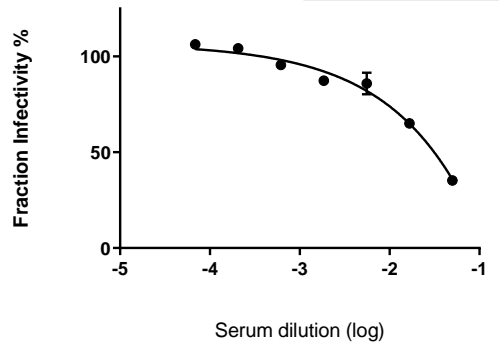

C005  
Visit 1

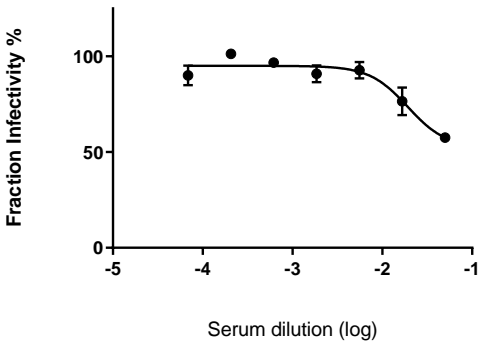

C005  
Visit 2

|           |        |
|-----------|--------|
| ND50      | 109.8  |
| ND80      | 21.37  |
| R squared | 0.9836 |

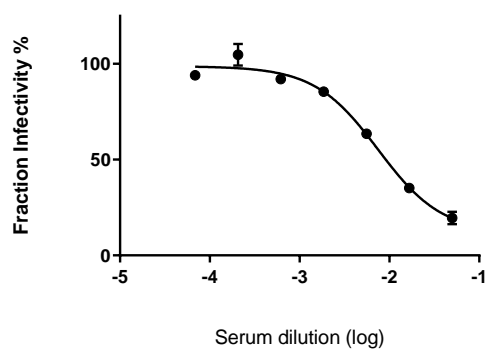

C005  
Visit 3

|           |        |
|-----------|--------|
| ND50      | 21.94  |
| ND80      | 3.074  |
| R squared | 0.9494 |

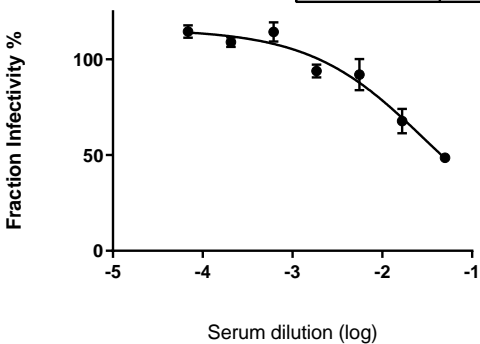

C005  
Visit 4

|           |        |
|-----------|--------|
| ND50      | 20.49  |
| ND80      | 0.000  |
| R squared | 0.9126 |

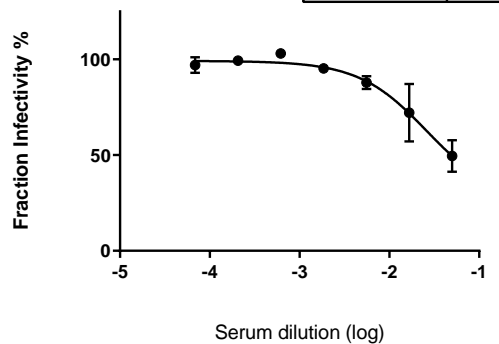



C006  
Visit 2

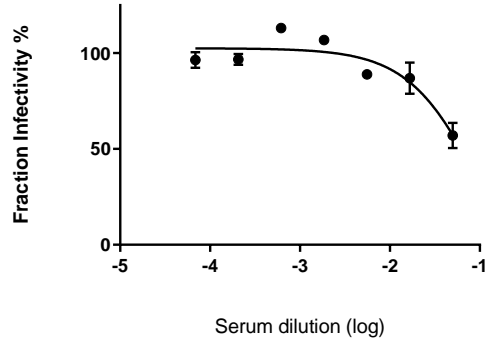

C006  
Visit 3

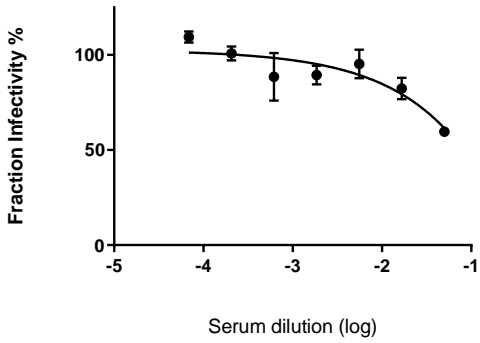

C007  
Visit 1

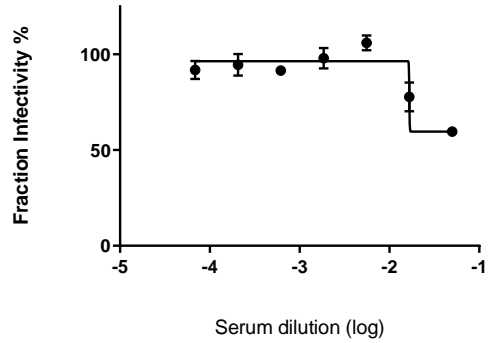

C007  
Visit 2

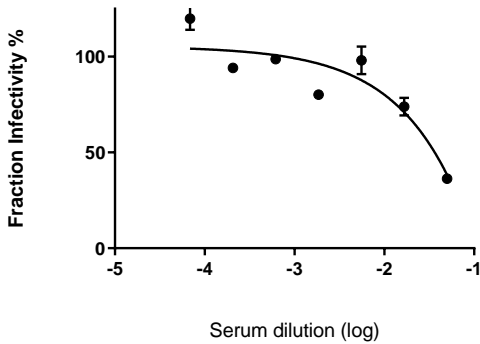

C007  
Visit 3

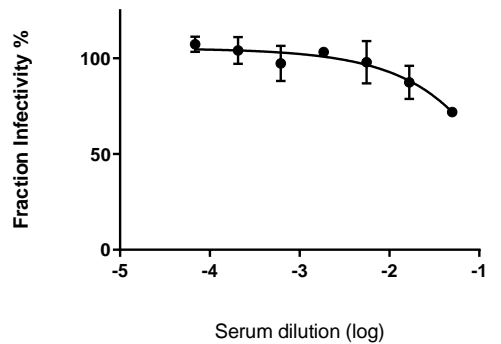

C009  
Visit 1

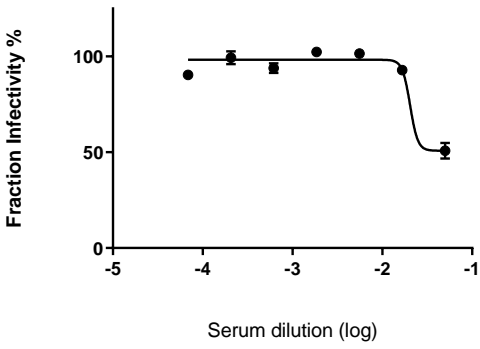

C009  
Visit 2

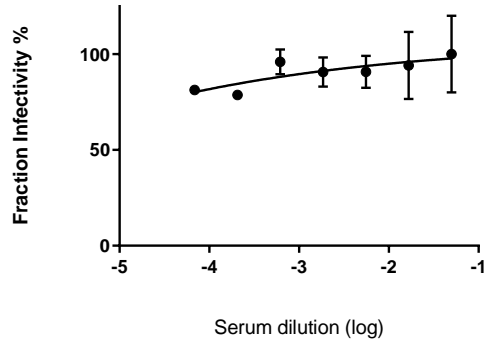

C009  
Visit 3

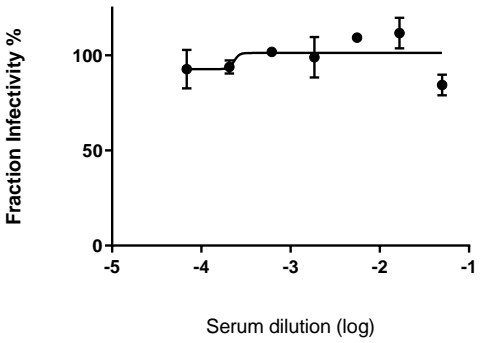

C011  
Visit 1

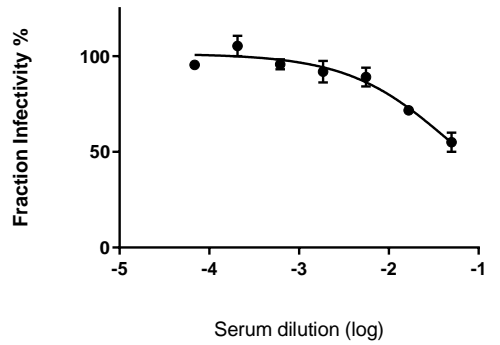

C011  
Visit 2

|           |        |
|-----------|--------|
| ND50      | 120.9  |
| ND80      | 37.95  |
| R squared | 0.9965 |

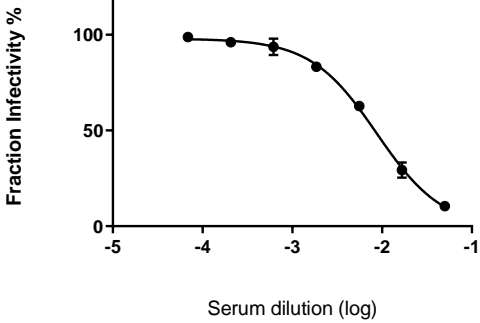

C011  
Visit 3

|           |        |
|-----------|--------|
| ND50      | 70.77  |
| ND80      | 29.48  |
| R squared | 0.9490 |

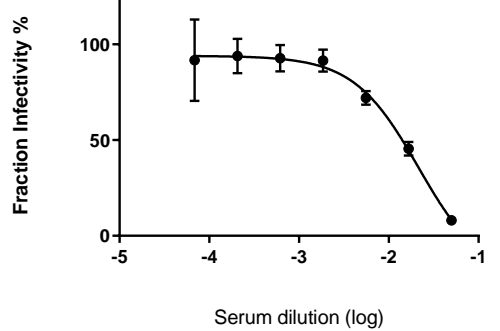

C011  
Visit 4

|           |        |
|-----------|--------|
| ND50      | 102.2  |
| ND80      | 31.80  |
| R squared | 0.9837 |

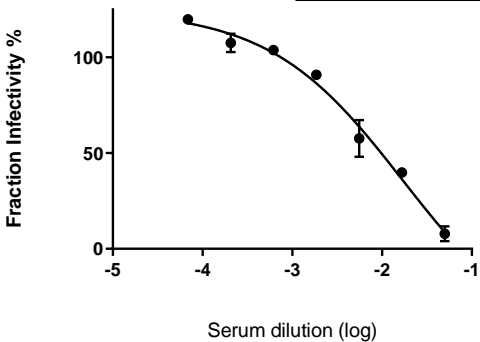

C010  
Visit 1

|           |        |
|-----------|--------|
| ND50      | 37.36  |
| ND80      | 0.000  |
| R squared | 0.9387 |

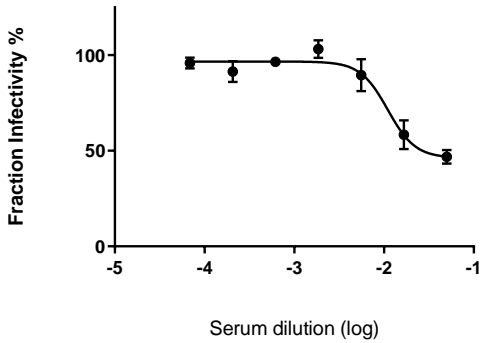

C010  
Visit 2

|           |        |
|-----------|--------|
| ND50      | 185.5  |
| ND80      | 32.28  |
| R squared | 0.9837 |

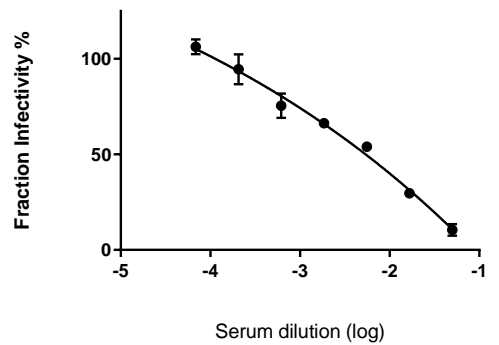

C010  
Visit 3

|           |        |
|-----------|--------|
| ND50      | 412.4  |
| ND80      | 165.2  |
| R squared | 0.9887 |

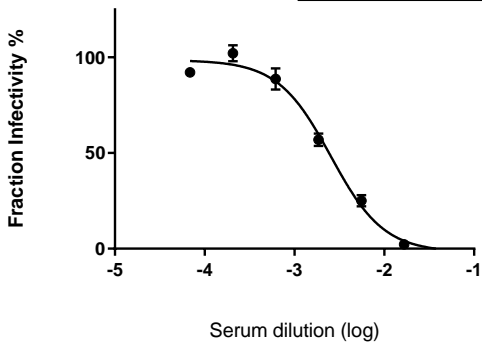

C010  
Visit 4

|           |        |
|-----------|--------|
| ND50      | 5858   |
| ND80      | 2646   |
| R squared | 0.9958 |

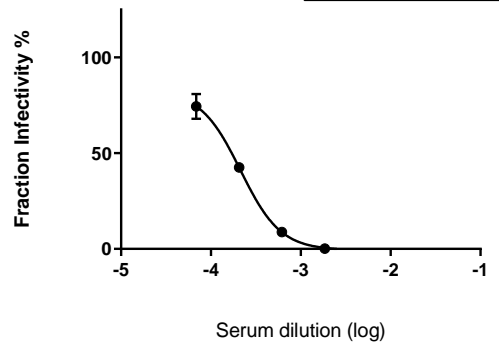

C010  
Visit 5

|           |        |
|-----------|--------|
| ND50      | 1050   |
| ND80      | 523.3  |
| R squared | 0.9929 |

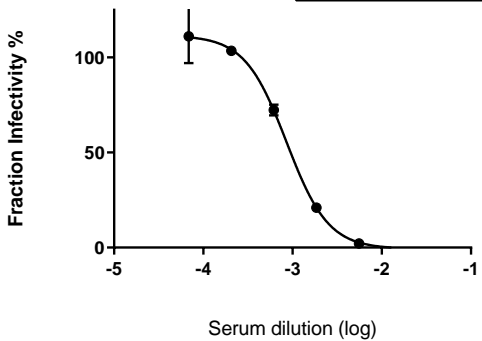

C012  
Visit 1

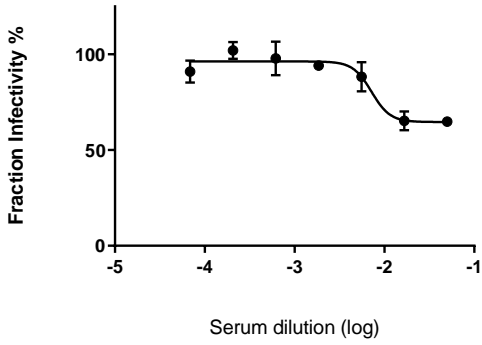

C012  
Visit 2

|           |        |
|-----------|--------|
| ND50      | 50.64  |
| ND80      | 0.000  |
| R squared | 0.9626 |

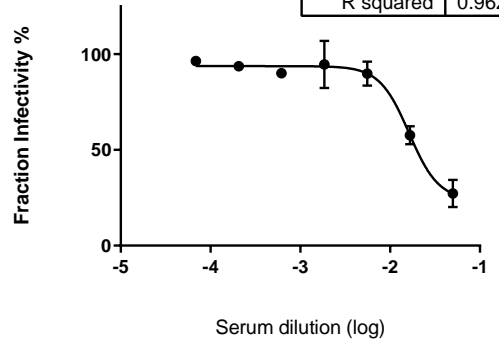

C012  
Visit 3

|           |        |
|-----------|--------|
| ND50      | 971.4  |
| ND80      | 527.1  |
| R squared | 0.9888 |

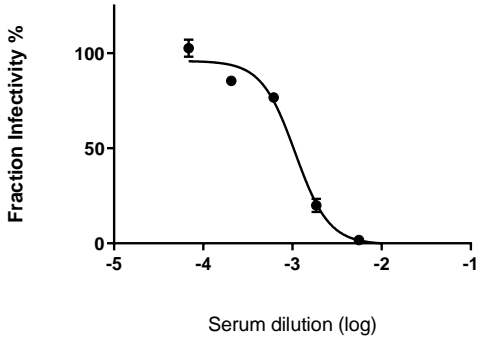

C013  
Visit 1

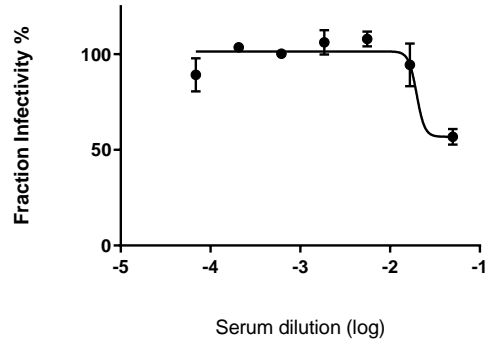

C013  
Visit 2

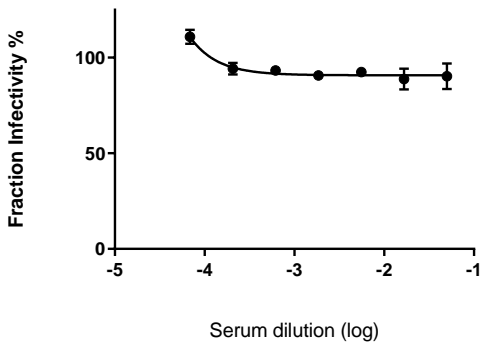

Supplement: BJH-197-306-s002.pdf [file BJH-197-306-s002.pdf]
